# Supplementary material
Source: ML conference proceedings conference paper supplement (https://proceedings.neurips.cc/paper_files/paper/2023/hash/ff6540c54a847ef9114a332c101f5edc-Abstract.html)
Supplement: Supplementary file 1 [file ff6540c54a847ef9114a332c101f5edc-Supplemental-Conference.zip]

Archive with 2 entries (2 files):
- Appendix.pdf
- __MACOSX/._Appendix.pdf
